# Supplementary material for: Biochemical Characterization of Glutamate Racemase—A New Candidate Drug Target against Burkholderia cenocepacia Infections
Source: PubMed Central journal article supplement (PMC5127577; doi:10.1371/journal.pone.0167350), 2016-11-29
Supplement: pone.0167350.s003.pdf [file pone.0167350.s003.pdf]

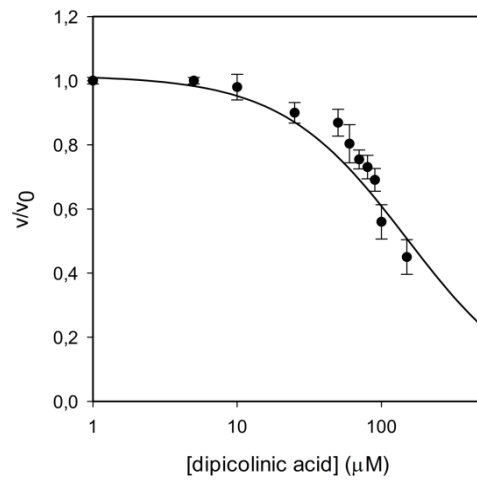

**S3 Fig. Inhibition of *BcGR* activity by dipicolinic acid.**  $\text{IC}_{50}$  value was determined at 20 mM of D-Glu, by fitting the experimental data as reported in Materials and Methods.
