# Supplementary material for: Biochemical Characterization of Glutamate Racemase—A New Candidate Drug Target against Burkholderia cenocepacia Infections
Source: PubMed Central journal article supplement (PMC5127577; doi:10.1371/journal.pone.0167350), 2016-11-29
Supplement: pone.0167350.s004.pdf [file pone.0167350.s004.pdf]

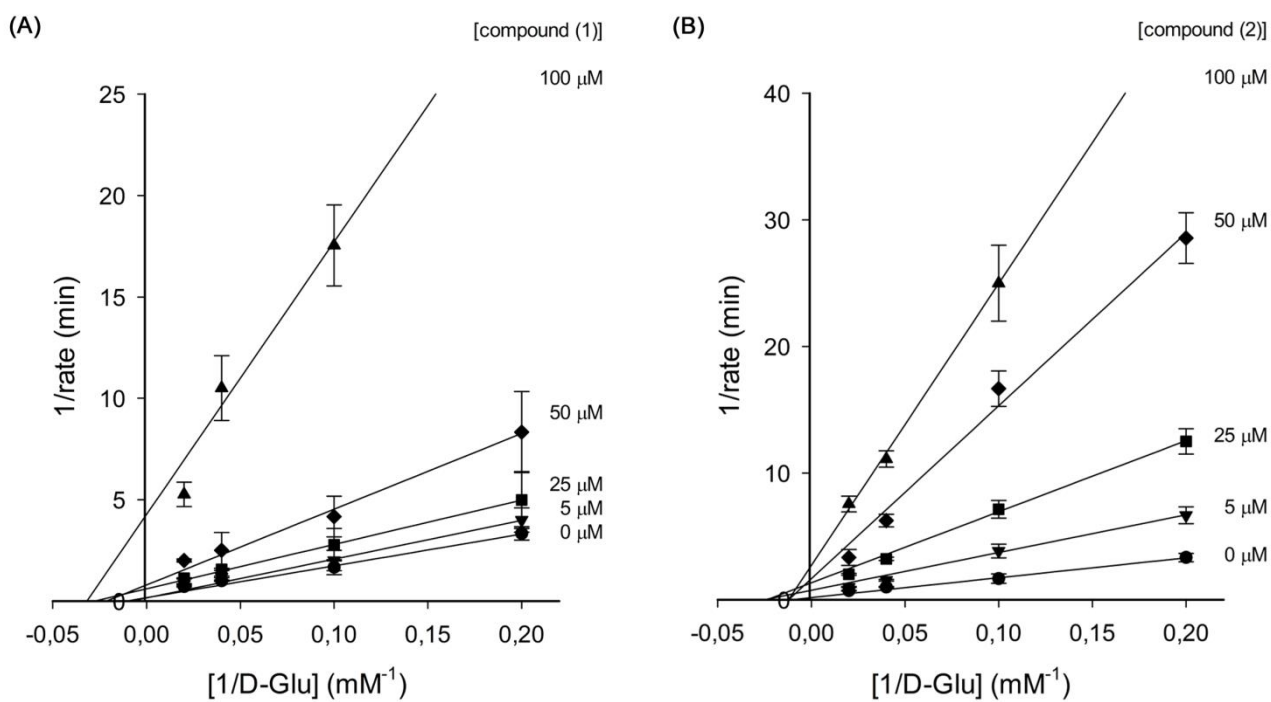

**S4 Fig. Kinetic analysis of *BcGR* in the presence of different concentrations of compound (1) (panel A) or compound (2) (panel B).** *BcGR* enzyme activity was determined at four different concentrations of D-Glu (range 5-50 mM), in the presence of five different concentrations of compounds (range 0-100 μM). The Lineweaver-Burk plot of the data reveals the non-competitive nature of the inhibition.
