# Supplementary material for: Biochemical Characterization of Glutamate Racemase—A New Candidate Drug Target against Burkholderia cenocepacia Infections
Source: PubMed Central journal article supplement (PMC5127577; doi:10.1371/journal.pone.0167350), 2016-11-29
Supplement: pone.0167350.s005.pdf [file pone.0167350.s005.pdf]

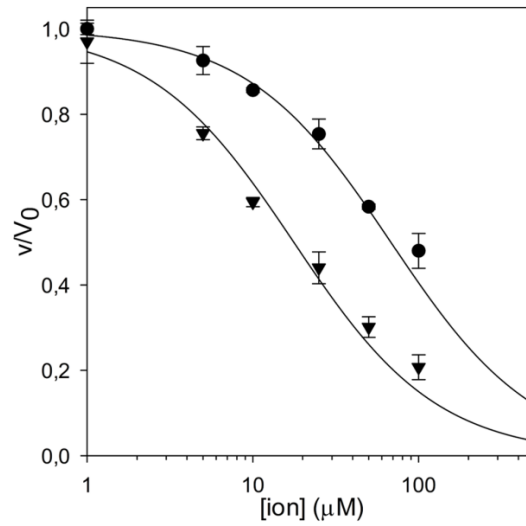

**S5 Fig. Inhibition of *BcGR* activity by ZnCl<sub>2</sub> and MnCl<sub>2</sub>.** IC<sub>50</sub> values of ZnCl<sub>2</sub> (●) and MnCl<sub>2</sub> (▼) were determined at 20 mM of D-Glu, by fitting the experimental data as reported in Materials and Methods.
