# Supplementary material for: Biochemical Characterization of Glutamate Racemase—A New Candidate Drug Target against Burkholderia cenocepacia Infections
Source: PubMed Central journal article supplement (PMC5127577; doi:10.1371/journal.pone.0167350), 2016-11-29
Supplement: pone.0167350.s008.pdf [file pone.0167350.s008.pdf]

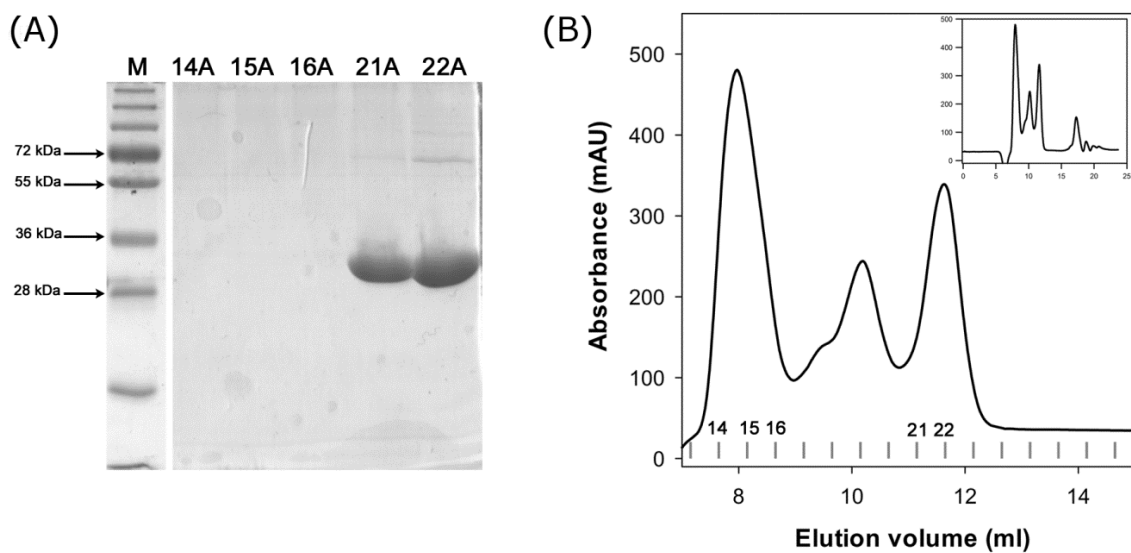

**S8 Fig. SDS-PAGE (A) of the exclusion volume fraction peak of the gel filtration of *BcGR* incubated with compound (2), revealing that the absorbance detected is not related to the protein.**
