# Supplementary material for: Biochemical Characterization of Glutamate Racemase—A New Candidate Drug Target against Burkholderia cenocepacia Infections
Source: PubMed Central journal article supplement (PMC5127577; doi:10.1371/journal.pone.0167350), 2016-11-29
Supplement: pone.0167350.s010.pdf [file pone.0167350.s010.pdf]

**S1 Table. List of *BcGR* structural homologs and analysis of their oligomeric state**

| Protein                           | PDB ID     | Sequence Identity (%) | Oligomeric state <sup>1</sup>   | Reference        |
|-----------------------------------|------------|-----------------------|---------------------------------|------------------|
| Murl from <i>M. smegmatis</i>     | 5JWV       | 41                    | Dimer, type 1                   | N/A <sup>2</sup> |
| Murl from <i>M. tuberculosis</i>  | 5HJ7       | 40                    | Dimer, type 1                   | N/A <sup>2</sup> |
| Murl from <i>E. coli</i>          | 2JFN       | 38                    | Monomer                         | [13]             |
| RacE from <i>B. subtilis</i>      | 1ZUW       | 32%                   | Dimer, type 2A<br>Dimer, type 6 | [16]             |
| RacE1 from <i>B. anthracis</i>    | 2DWU       | 32%                   | Dimer, type 2A<br>Dimer, type 4 | [31]             |
| Murl from <i>L. monocytogenes</i> | 3HFR       | 32%                   | Dimer, type 2B                  | N/A <sup>2</sup> |
| Murl from <i>A. pyrophilus</i>    | 1B73       | 32%                   | Dimer, type 5                   | [12]             |
| RacE2 from <i>B. anthracis</i>    | 2GZM       | 31%                   | Dimer, type 2A                  | [31]             |
| Murl from <i>E. faecalis</i>      | 2JFO, 2VVT | 31%                   | Dimer, type 2B                  | [13,15]          |
| Murl from <i>S. pyogenes</i>      | 2OHG, 2OHO | 31%                   | Dimer, type 2C                  | [17]             |
| Murl from <i>C. jejuni</i>        | 3UHF       | 31%                   | Dimer, type 3                   | N/A <sup>2</sup> |
| Murl from <i>S. aureus</i>        | 2JFQ       | 30%                   | Dimer, type 2A                  | [13]             |
| Murl from <i>E. faecium</i>       | 2JFU       | 30%                   | Dimer, type 2C                  | [13]             |
| Murl from <i>H. pylori</i>        | 2JFX       | 30%                   | Dimer, type 3                   | [13]             |
| Murl from <i>F. tularensis</i>    | 3OUT       | 29%                   | Dimer, type 3                   | N/A <sup>2</sup> |

<sup>1</sup> Evaluation of oligomeric state based on PISA analysis (Krissinel and Henrick. Inference of macromolecular assemblies from crystalline state. 2007 J Mol Biol. 372, 774-797) of the three-dimensional structures available on the PDB. Dimer types are described in supplementary figure Fig. S2.

<sup>2</sup> there is no publication associated to this entry in the protein data bank.
