# Supplementary material for: Biochemical Characterization of Glutamate Racemase—A New Candidate Drug Target against Burkholderia cenocepacia Infections
Source: PLoS One. 2016 Nov 29;11(11):e0167350. doi: 10.1371/journal.pone.0167350 (PMC5127577; doi:10.1371/journal.pone.0167350)
Supplement: S7 Fig — (PDF) [file pone.0167350.s007.pdf]

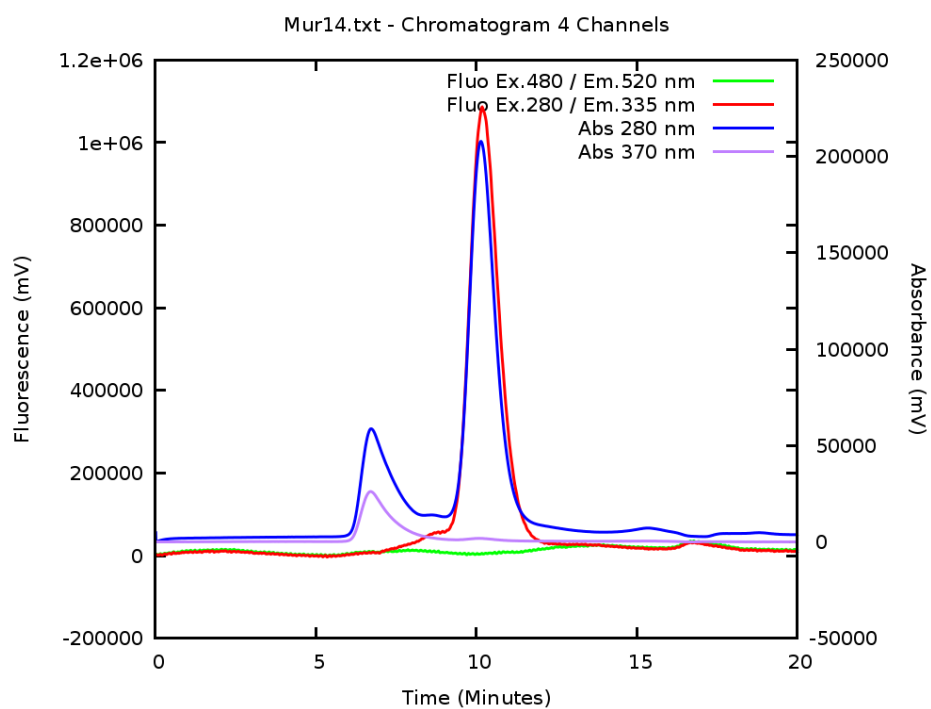

**S7 Fig. Absorbance and fluorescence chromatographic profile on Superdex 75 5/150 GL column of *BcGR* incubated with compound (2).**
